# Supplementary material for: Cost-effective polymer donors with simple structure for organic solar cells
Source: Royal Society of Chemistry journal article supplement (doi:10.1039/d4ta03254c), 2024-01-01
Supplement: d4ta03254c1.pdf [file d4ta03254c1.pdf]

## Supporting Information

### Cost-effective polymer donors with simple structure for organic solar cells

Xue Zhou<sup>‡a,b</sup>, Chuantao Gu<sup>‡\*a,c</sup>, Chunying Zheng<sup>a</sup>, Bing Liu<sup>c</sup>, Yong Tian<sup>a</sup>, Huan Yang<sup>b,d</sup>, Jiping Ma<sup>a</sup> and Xichang Bao<sup>\*b,d</sup>

<sup>a</sup> School of Environmental and Municipal Engineering, Qingdao University of Technology, Qingdao 266520, China. E-mail: guchuantao@qut.edu.cn

<sup>b</sup> Key Laboratory of Photoelectric Conversion and Utilization of Solar Energy, Qingdao Institute of Bioenergy and Bioprocess Technology, Chinese Academy of Sciences, Qingdao 266101, China. E-mail: baoxc@qibebt.ac.cn

<sup>c</sup> State Key Laboratory of Bio-Fibers and Eco-Textiles (Qingdao University), Qingdao 266071, China.

<sup>d</sup> Functional Laboratory of Solar Energy, Shandong Energy Institute, Qingdao 266101, China.

‡ Xue Zhou and Chuantao Gu contributed equally to this work.

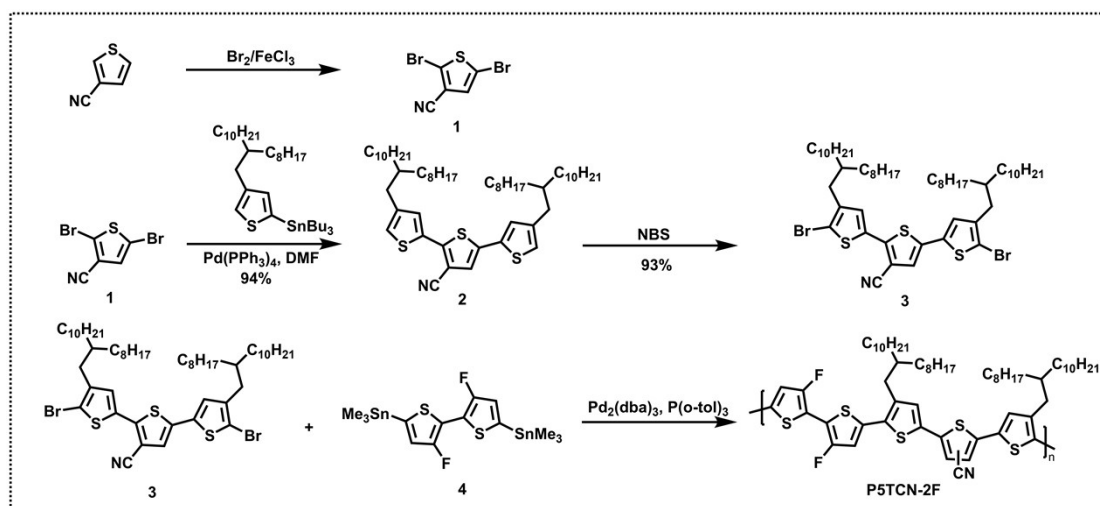

**Figure S1.** The detailed synthetic route of each step of P5TCN-2F.<sup>1</sup>

**Table S1.** The MOC evaluation of P5TCN-2F.

| P5TCN-2F (1g)                                                                       |          |               |          |
|-------------------------------------------------------------------------------------|----------|---------------|----------|
| Reagent                                                                             | Quantity | Unit          | Cost(\$) |
| $\text{Pd}_2(\text{dba})_3$                                                         | 0.021g   | 36.189\$/1g   | 0.760    |
| $\text{P}(\text{o-tol})_3$                                                          | 0.054g   | 4.954\$/5g    | 0.0534   |
| 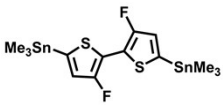 | 0.58g    | 468.115\$/5g  | 54.301   |
| NBS                                                                                 | 0.42g    | 2.752\$/25g   | 0.0462   |
|  | 5.07g    | 6.605\$/5g    | 6.700    |
| $\text{Pd}(\text{PPh}_3)_4$                                                         | 0.15g    | 378.4\$/25g   | 2.270    |
| DMF                                                                                 | 27.62ml  | 2.752\$/100ml | 0.760    |
| $\text{FeCl}_3$                                                                     | 0.00414g | 2.752\$/100g  | 0.000114 |
|  | 0.19g    | 8.806\$/5g    | 0.335    |
| Total Cost                                                                          |          |               | 65.226   |

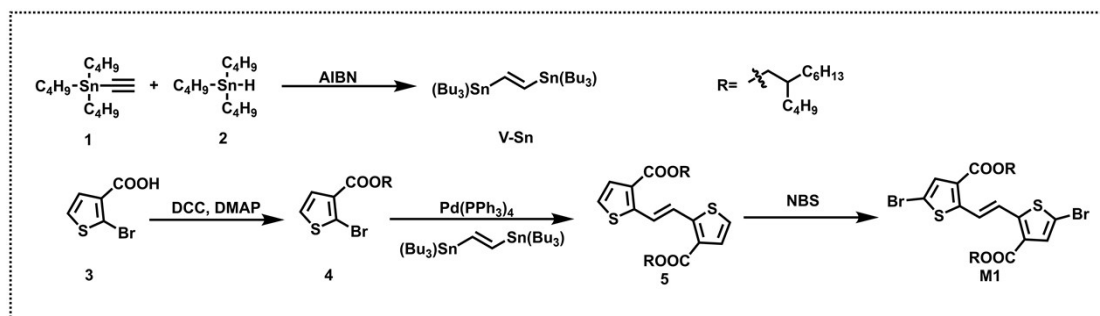

**Figure S2.** The detailed synthetic route of each step of the acceptor unit of PTVT-T.<sup>2</sup>

**Table S2.** The MOC evaluation of the acceptor unit of PTVT-T.

| The acceptor unit of PTVT-T (1g)   |          |                |          |
|------------------------------------|----------|----------------|----------|
| Reagent                            | Quantity | Unit           | Cost(\$) |
| NBS                                | 0.545g   | 2.752\$/25g    | 0.060    |
| Pd(PPh <sub>3</sub> ) <sub>4</sub> | 0.0577g  | 378.4\$/25g    | 0.873    |
| AIBN                               | 0.0044g  | 3.44\$/25g     | 0.000605 |
|                                    | 0.585g   | 331.341\$/2.5g | 77.534   |
|                                    | 0.569g   | 181.632\$/25g  | 4.134    |
| DCC                                | 1.36g    | 2.064\$/25g    | 0.112    |
| DMAP                               | 0.322g   | 2.752\$/25g    | 0.0354   |
|                                    | 0.908g   | 100.173\$/25g  | 3.638    |
| Total Cost                         |          |                | 86.387   |

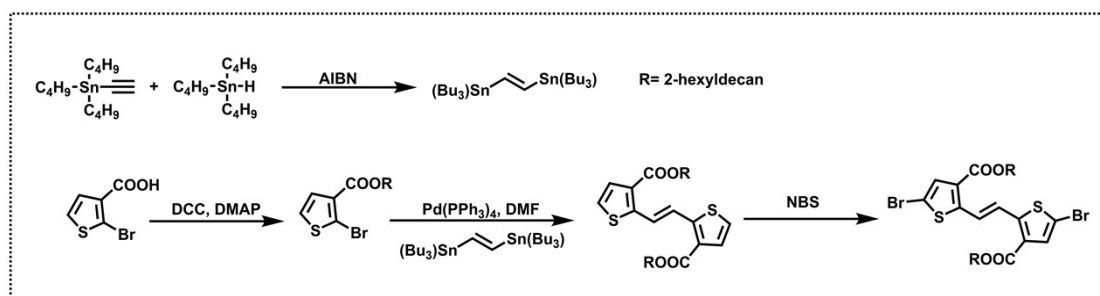

**Figure S3.** The detailed synthetic route of each step of the acceptor unit of PTVT-BT.<sup>3</sup>

**Table S3.** The MOC evaluation of the acceptor unit of PTVT-BT.

| The acceptor unit of PTVT-BT (1g)  |          |                |          |
|------------------------------------|----------|----------------|----------|
| Reagent                            | Quantity | Unit           | Cost(\$) |
| NBS                                | 0.518g   | 2.752\$/25g    | 0.057    |
| Pd(PPh <sub>3</sub> ) <sub>4</sub> | 0.0593g  | 378.4\$/25g    | 0.898    |
| AIBN                               | 4.273mg  | 3.44\$/25g     | 0.000588 |
|                                    | 0.5624g  | 331.341\$/2.5g | 74.538   |
|                                    | 0.547g   | 181.632\$/25g  | 3.974    |
| DMF                                | 1.1397ml | 2.752\$/100ml  | 0.0314   |
| DCC                                | 1.4429g  | 2.064\$/25g    | 0.119    |
| DMAP                               | 0.3426g  | 2.752\$/25g    | 0.0377   |
|                                    | 0.965g   | 100.173\$/25g  | 3.867    |
| Total Cost                         |          |                | 83.523   |

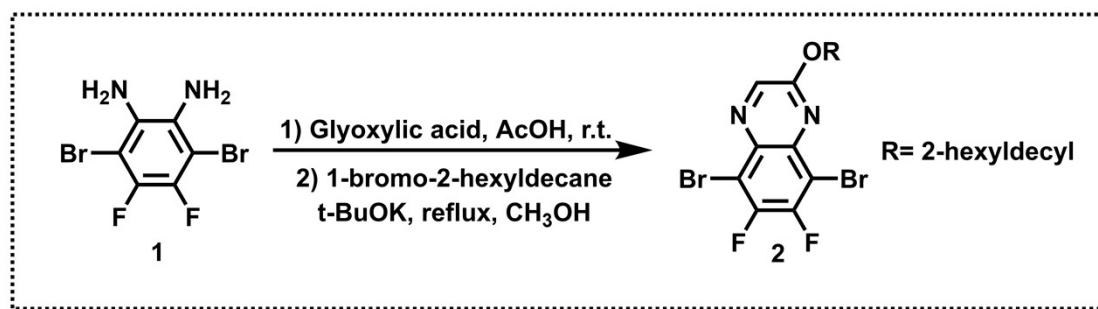

**Figure S4.** The detailed synthetic route of each step of the acceptor unit of PTQ10.<sup>4</sup>

**Table S4.** The MOC evaluation of the acceptor unit of PTQ10.

| The acceptor unit of PTQ10 (1g)                                                     |           |                |          |
|-------------------------------------------------------------------------------------|-----------|----------------|----------|
| Reagent                                                                             | Quantity  | Unit           | Cost(\$) |
| Glyoxylic acid                                                                      | 0.1440g   | 2.064\$/25g    | 0.012    |
| AcOH                                                                                | 19.4800ml | 38.115\$/500ml | 1.485    |
| 1-bromo-2-hexyldecane                                                               | 0.5825g   | 4.128\$/5g     | 0.481    |
| t-BuOK                                                                              | 0.2565g   | 2.752\$/25g    | 0.028    |
| CH <sub>3</sub> OH                                                                  | 19.4800ml | 6.880\$/500ml  | 0.268    |
|  | 0.5883g   | 217.408\$/5g   | 25.580   |
| Total Cost                                                                          |           |                | 27.854   |

## References

- 1 X. Yuan, Y. Zhao, Y. Zhang, D. Xie, W. Deng, J. Li, H. Wu, C. Duan, F. Huang and Y. Cao, *Adv. Funct. Mater.*, 2022, **32**, 2201142.
- 2 J. Ren, P. Bi, J. Zhang, J. Liu, J. Wang, Y. Xu, Z. Wei, S. Zhang and J. Hou, *Natl. Sci. Rev.*, 2021, **8**, nwab031.
- 3 P. Bi, J. Ren, S. Zhang, J. Wang, Z. Chen, M. Gao, Y. Cui, T. Zhang, J. Qin, Z. Zheng, L. Ye, X. Hao and J. Hou, *Nano Energy*, 2022, **100**, 107463.
- 4 C. Sun, F. Pan, H. Bin, J. Zhang, L. Xue, B. Qiu, Z. Wei, Z.-G. Zhang and Y. Li, *Nat. Commun.*, 2018, **9**, 743.
